# Supplementary material for: Identifying source regions of air masses sampled at the tropicalhigh-altitude site of Chacaltaya using WRF-FLEXPART and clusteranalysis
Source: Copernicus journal article supplement (doi:10.5194/acp-2021-126), 2021-03-25
Supplement: Supplementary file 1 [file acp-2021-126-supplement.pdf]

## Supplementary Material

| domain | lower left [°] |       | upper right [°] |       | p.g.r.* | res.** | number of cells |       | parent start |     |
|--------|----------------|-------|-----------------|-------|---------|--------|-----------------|-------|--------------|-----|
|        | lat.           | lon.  | lat.            | lon.  |         |        | w.e.†           | s.n.‡ | i            | j   |
| D01    | -32.2          | -89.4 | -0.5            | -43.2 | 1       | 38.0   | 118             | 86    | 1            | 1   |
| D02    | -26.3          | -78.7 | -7.2            | -53.9 | 4       | 9.5    | 253             | 205   | 28           | 18  |
| D03    | -20.5          | -70.9 | -13.9           | -62.0 | 3       | 3.2    | 274             | 214   | 80           | 65  |
| D04    | -17.2          | -69.0 | -15.6           | -67.3 | 3       | 1.0    | 154             | 151   | 61           | 110 |

**Table S1.** Description of the domains used for the WRF simulation. \* parent grid ratio, \*\* resolution (km), † west east, ‡ south north

| short name | SRR [%]<br>$n_c = 6$ | distance from CHC [km] | height above ground [km] | height above sea level [km] | $\frac{SRR_{<1.5km}}{SRR_{total}}$ [%] | age [h] |
|------------|----------------------|------------------------|--------------------------|-----------------------------|----------------------------------------|---------|
| 03_PW      | 29.0                 | 518                    | 5.0                      | 5.9                         | 18                                     | 51      |
| 05_PW      | 11.4                 | 428                    | 3.0                      | 6.3                         | 31                                     | 45      |
| 07_PW      | 13.9                 | 721                    | 6.5                      | 7.7                         | 10                                     | 54      |
| 08_PW      | 17.7                 | 238                    | 2.5                      | 5.7                         | 43                                     | 36      |
| 11_PW      | 19.6                 | 465                    | 4.5                      | 6.6                         | 22                                     | 53      |
| 12_PW      | 8.4                  | 76                     | 1.8                      | 4.3                         | 62                                     | 27      |

**Figure S1.** Describes the properties of the main 6 pathways (similar to Fig. 12). The main pathway's digits refer to the clockwise direction of the centre of mass of the air masses. The colours are unique for each PW and the same scheme is used on Fig. 12 and Fig. 5a and b. The SRR [%] columns describe the average contribution of each cluster. We also show the distance from CHC, height above ground and height above sea level of each cluster's centre of mass. Furthermore,  $\frac{SRR_{<1.5km}}{SRR_{total}}$  [%] shows the ratio between the SRR below 1.5 km and the SRR summed over the full vertical column ( $SRR_{total}$ ).

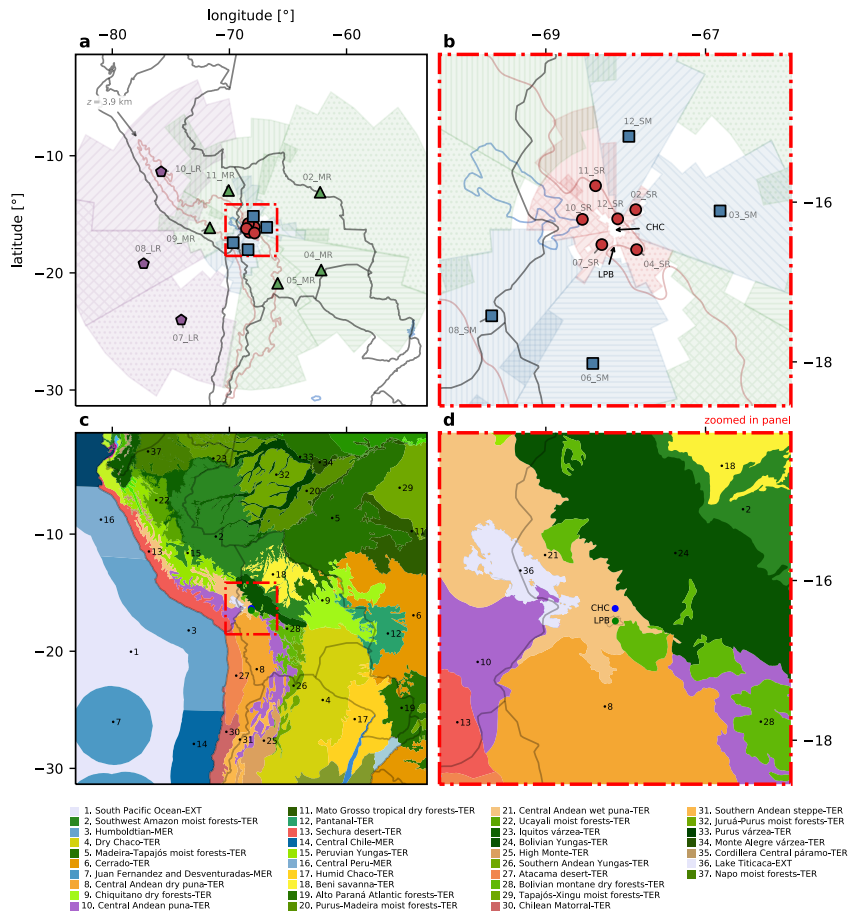

**Figure S2.** Panels a) and b) show the horizontal location of the 18 clusters. The colour is related to their distance range from CHC and the hatch distinguishes each cluster independently. For easier visualization, we only show 80% of the grid cells where the SRR is highest. We also show the centroid markers for each of the clusters. Each cluster centroid is marked with a disk (short range), square (short-medium range), triangle (medium range), or pentagon (long range) locator. The brown line corresponds to a height of 3.9 km a.s.l. and encircles the Altiplano plateau. Panel b) corresponds to the region inside the red rectangle in panel a). Panels c) and d) show the eco-regions as described in Section 4 and are shown for comparing the area of the pathways to the under-laying biome.

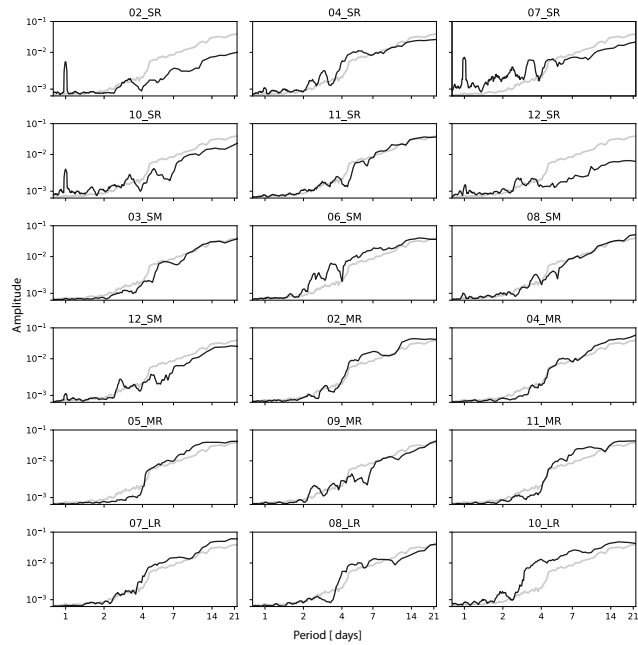

**Figure S3.** Power spectra of the clusters' timeseries obtained via the Fourier transform. In light gray is the median of all the spectra (shown for reference). Clusters 02\_SR, 07\_SR, 03\_SR and 12\_SR show a local peak at a daily frequency and therefore are analysed in detail in Figs. S4 to S7

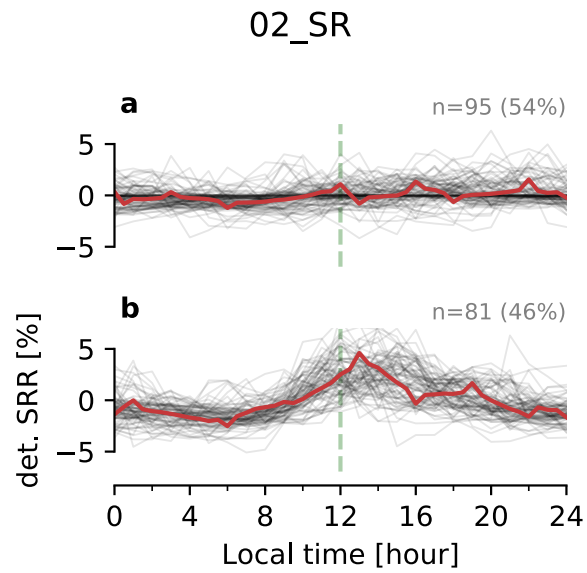

**Figure S4.** Detrended daily SRR timeseries of cluster 02\_SR divided into a) no diurnal influence and b) diurnal influence by applying a dynamic time warping classification with 2 groups. In grey, we show the timeseries for each single modelled day and red line is the group median evolution.

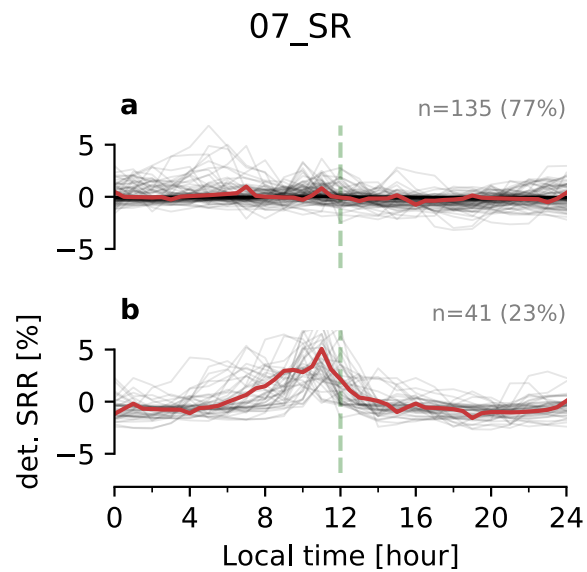

**Figure S5.** Similar to Fig. S4 but for cluster 07\_SR.

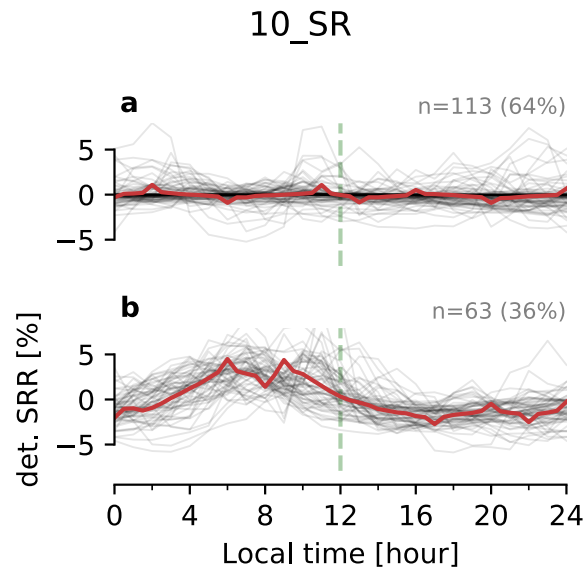

**Figure S6.** Similar to Fig. S4 but for cluster 10\_SR.

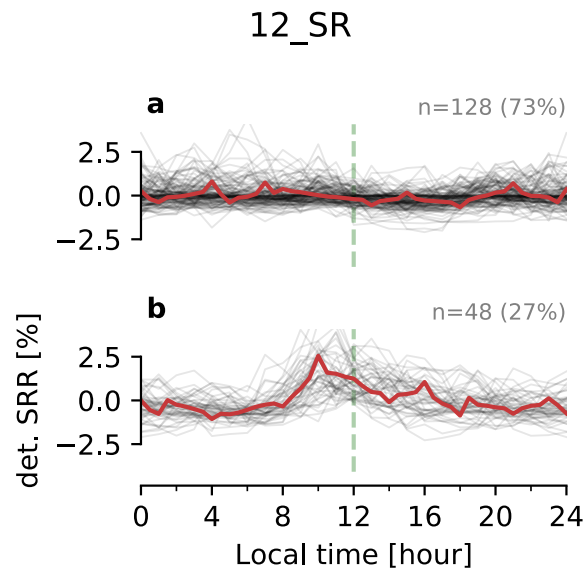

**Figure S7.** Similar to Fig. S4 but for cluster 12\_SR.

|                                         | 02_MR | 02_SR | 03_SM | 04_MR | 04_SR | 05_MR | 06_SM | 07_LR | 07_SR | 08_LR | 08_SM | 09_MR | 10_LR | 10_SR | 11_MR | 11_SR | 12_SM | 12_SR |     |
|-----------------------------------------|-------|-------|-------|-------|-------|-------|-------|-------|-------|-------|-------|-------|-------|-------|-------|-------|-------|-------|-----|
| 1.South Pacific Ocean-EXT               |       |       |       |       |       |       |       | 34    |       | 78    |       |       | 12    |       |       |       |       |       |     |
| 2.Southwest Amazon moist forests-TER    | 5     |       | 45    | 1     |       |       |       |       |       |       |       |       | 24    |       | 59    |       | 53    |       |     |
| 3.Humboldtian-MER                       |       |       |       |       |       | 1     | 19    |       |       | 19    | 34    | 32    | 16    |       |       |       |       |       |     |
| 4.Dry Chaco-TER                         |       |       | 42    |       | 19    |       |       |       |       |       |       |       |       |       |       |       |       |       |     |
| 5.Madeira-Tapajós moist forests-TER     | 30    |       |       |       |       |       |       |       |       |       |       |       |       |       | 2     |       |       |       |     |
| 6.Cerrado-TER                           | 21    |       | 10    |       |       |       |       |       |       |       |       |       |       |       |       |       |       |       |     |
| 7.Juan Fernandez and Desventuradas-MER  |       |       |       |       |       |       | 25    |       |       | 3     |       |       |       |       |       |       |       |       |     |
| 8.Central Andean dry puna-TER           |       |       |       | 3     | 25    | 63    |       |       | 11    |       | 16    |       |       |       |       |       |       |       |     |
| 9.Chiquitano dry forests-TER            | 10    |       | 2     | 7     |       |       |       |       |       |       |       |       |       |       |       |       |       |       |     |
| 10.Central Andean puna-TER              |       |       |       |       | 19    |       |       |       |       |       | 17    | 22    | 2     | 10    |       |       |       |       |     |
| 11.Mato Grosso tropical dry forests-TER | 12    |       |       |       |       |       |       |       |       |       |       |       |       |       |       |       |       |       |     |
| 12.Pantanal-TER                         | 6     |       |       | 7     |       |       |       |       |       |       |       |       |       |       |       |       |       |       |     |
| 13.Sechura desert-TER                   |       |       |       |       |       |       |       |       |       |       | 20    | 29    | 8     |       |       |       |       |       |     |
| 14.Central Chile-MER                    |       |       |       |       |       |       |       | 16    |       |       |       |       |       |       |       |       |       |       |     |
| 15.Peruvian Yungas-TER                  |       |       |       |       |       |       |       |       |       |       |       | 8     | 9     |       | 8     |       |       |       |     |
| 16.Central Peru-MER                     |       |       |       |       |       |       |       |       |       |       |       |       | 11    |       |       |       |       |       |     |
| 17.Humid Chaco-TER                      |       |       |       | 14    |       |       |       |       |       |       |       |       |       |       |       |       |       |       |     |
| 18.Beni savanna-TER                     | 6     |       | 6     |       |       |       |       |       |       |       |       |       |       |       | 2     |       | 10    |       |     |
| 19.Alto Paraná Atlantic forests-TER     |       |       |       | 12    |       |       |       |       |       |       |       |       |       |       |       |       |       |       |     |
| 20.Purus-Madeira moist forests-TER      | 4     |       |       |       |       |       |       |       |       |       |       |       |       |       |       |       |       |       | 7   |
| 21.Central Andean wet puna-TER          |       | 16    |       |       | 23    |       | 2     |       | 89    |       | 2     | 7     | 4     | 56    | 7     | 35    |       |       | 100 |
| 22.Ucayali moist forests-TER            |       |       |       |       |       |       |       |       |       |       |       |       | 7     |       |       |       |       |       |     |
| 23.Iquitos várzea-TER                   |       |       |       |       |       |       |       |       |       |       |       |       | 6     |       | 4     |       |       |       |     |
| 24.Bolivian Yungas-TER                  |       | 84    | 45    | 2     | 5     |       |       |       |       |       |       |       |       |       | 3     | 44    | 37    |       |     |
| 25.High Monte-TER                       |       |       |       |       |       |       | 11    |       |       |       |       |       |       |       |       |       |       |       |     |
| 26.Southern Andean Yungas-TER           |       |       |       | 1     |       |       | 8     |       |       |       |       |       |       |       |       |       |       |       |     |
| 27.Atacama desert-TER                   |       |       |       |       |       | 3     | 34    | 2     |       |       | 11    |       |       |       |       |       |       |       |     |
| 28.Bolivian montane dry forests-TER     |       |       | 1     | 3     | 69    | 5     |       |       |       |       |       |       |       | 2     |       |       | 21    |       |     |
| 31.Southern Andean steppe-TER           |       |       |       |       |       | 7     |       |       |       |       |       |       |       |       |       |       |       |       |     |
| 36.Lake Titicaca-EXT                    |       |       |       |       |       |       |       |       |       |       |       | 1     |       | 33    |       |       |       |       |     |

**Table S2.** Table showing the ecoregions and the land cover percentage that they occupy in each of the 18-clusters. For a description of the ecoregions see Section 4
